# Supplementary material for: Predicting climate change effects on wetland ecosystem services using species distribution modeling and plant functional traits
Source: PubMed Central journal article supplement (PMC4288999; doi:10.1007/s13280-014-0593-9), 2015-01-09
Supplement: 13280_2014_593_MOESM1_ESM.pdf [file 13280_2014_593_MOESM1_ESM.pdf]

***AMBIO***

Electronic Supplementary Material

*This supplementary material has not been peer reviewed.*

**Title: Predicting climate change effects on wetland ecosystem services using species distribution modeling and plant functional traits**

Authors: Helen Moor, Kristoffer Hylander, Jon Norberg

## Electronic Supplementary Material – Data

---

### Properties of the Swedish National Wetland Inventory (VMI) data and details on species distribution modeling (SDM) with MaxEnt

The VMI was a nationwide effort to survey the Swedish wetlands below the alpine region, directed by the Swedish Environmental Protection Agency (Gunnarsson and Löfroth 2009). A total of 35 000 sites were included and mapped using aerial photographs. More than 4 000 wetlands were surveyed in the field, generating plant species lists including estimates of plant abundance (on a scale of 1 to 3, from single individuals to dominant).

Only large wetlands were surveyed (> 10 ha in Southern Sweden, > 50 ha in the North), leaving presumably large numbers of small or ephemeral wetlands uncatalogued. Methodology was standardized, but observer's bias is hard to avoid in an effort involving dozens of researchers. Also, since the main aim was description of vegetation types, not all species lists are complete, as own point field surveys revealed.

Within field surveyed wetlands, sub-objects of differing characteristics (hydrology, vegetation type) were delineated and assigned to more detailed wetland types. As species lists and wetland type classification are associated with these sub-objects, our analyses are based on this level, i.e. on spatial scales smaller than the main wetland objects.

These points are typical weaknesses of large datasets like the VMI. Fortunately, species distribution modeling methods are designed to deal with exactly such data.

#### *MaxEnt*

We treated occurrence data as presence only, acknowledging that absence from a species list did not necessarily imply true absence. For such data, MaxEnt is the method of choice (Philips et al. 2006, Elith et al. 2006). The method is robust also to the limitation to relatively few occurrence points throughout a species' range (omission of small wetlands) and potential sampling bias (field inventories of high nature value wetlands) (Elith and Leathwick 2009). MaxEnt does not project occurrences into geographical space, but directly into n-dimensional environmental space, thus overcoming issues of spatial autocorrelation (Elith et al. 2011). To counter potential sampling bias in terms of environmental space, we used all inventoried VMI wetlands as a targeted background (Philips and Dudík 2008).

As we modeled current and future distributions of species across the whole extent of Sweden, regional predictions for the Norrström Drainage Basin (NDB) are expected to be robust to weaknesses in primary data as well as the lack of data for surrounding countries (for species with ranges that extend further south).

Predictor variables were pre-selected both based on ecological relevance and driven by data (i.e. strong contribution to models across all species run with a full predictor set). Models were run with default values for parameters, applying linear and quadratic features only. Clamping was avoided to allow for extrapolation to new combinations of environmental drivers. 5-fold cross-validation was performed and model results averaged.

Climatic variables were obtained from Worldclim at a resolution of 0.5° (~630 m) (Hijmans et al. 2005). For the future scenario we used predictions by 2070 of the HadGEM2-AO model at an intermediate emission scenario (RCP 6.0). For the Norrström Drainage Basin (NDB), the model predicts an increase in mean annual temperature of +2.85°C, and a decrease in precipitation of -6.7%. A digital elevation model (DEM) was constructed from 50m resolution elevation data from the Swedish Land Survey (Lantmäteriet 2010). Soil and bedrock data at 1km resolution were obtained from the Swedish Geological Survey (SGU 2013). pH point measurements (n = 20 733) from the Swedish National Forest Inventory (SLU 2013) were interpolated at a resolution of 50 m using a random forest model, with soil type, bedrock type, elevation and land cover as predictors. All rasters were resampled to a common resolution of 500 m with either mean or mode algorithms using GDAL version 1.10.1.

### *Scaling relationships*

The relationship between the estimate of abundance from the SDM approach and the potential relative biomass of each species in the community can be inferred by using general allometric scaling relationships between species height, individual biomass and density. Specifically, height (m) is proportional to biomass  $M^{0.264}$  (M in kg dry weight, Niklas and Enquist 2001), according to the power law

$$H = b * M^a \quad (1)$$

where  $a = 0.264$ ,  $b = 2.58$ , and for trees:  $a = 0.345$ ,  $b = 3.71$ . Hence, individual biomass (kg) can be estimated from height (m) as

$$M = (H / b)^{1/a} \quad (2)$$

And maximum abundance  $N$  (ind.  $m^{-2}$ ) scales with  $M^{-0.757}$  (M in g, Belgrano et al. 2002) according to

$$N = 948 * M [g]^{-0.757} = 948 * (M [kg] / 1000)^{-0.757} = 176932.8 * M [kg]^{-0.757} \quad (3)$$

Putting these relationships together we estimated maximum potential biomass (kg dry weight  $m^{-2}$ ) from height (m) as

$$B_{max} = M * N = 176932.8 * (H/b)^{(-0.757/a)} \quad (3)$$

### *Wetland distribution in the NDB*

In terms of SDM, spatial heterogeneity of wetland type distribution and species occurrence points is not problematic. Regarding the potential for ES delivery however, wetland distribution in the landscape matters (Mitsch and Gosselink 2001).

The VMI coverage of NDB wetlands (Fig. A1, A-C) appears to be in general agreement with wetland area recorded in Swedish land cover data (Fig. A1, D). In the VMI data, the distributions of different wetland types follow a similar pattern, except for relatively higher numbers of riparian wetlands in the lowlands surrounding lakes Hjälmaren and Mälaren (Fig. A1, C), consistent with a higher percentage of inland marshes there (recorded as CORINE land cover types, Table A1).

In the NDB, a gradient of increasing human population density and percentage of agricultural area towards south and east (Fig. A1, E) coincides with fewer wetlands in the landscape (Fig. A1, A-D). Striking is the generally high density of wetlands in our region 2, characterized by intermediate elevation (average 119 m)

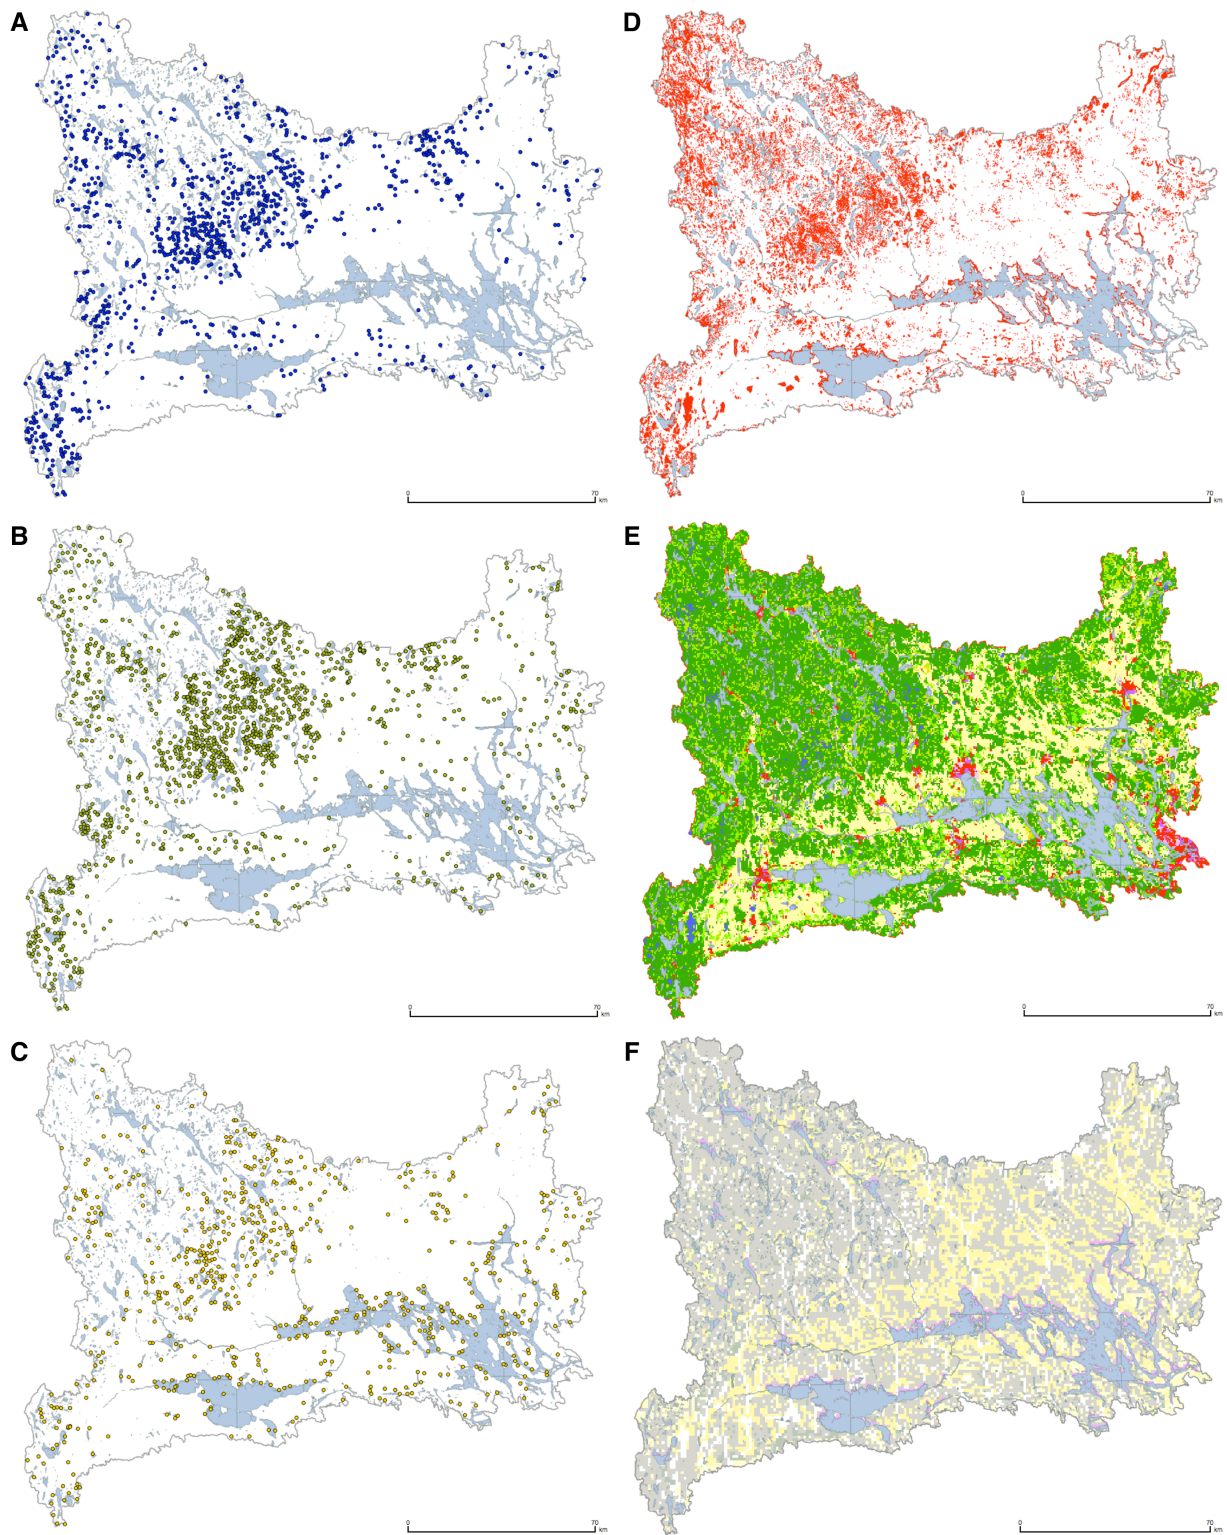

**Fig. S1** Regional distribution of wetlands in the NDB. Panels A-C show wetlands catalogued in the VMI: bogs (A, N=1079), Fens (B, N=1391), and riparian wetlands (C, N=697). Panel D shows wetland area extracted from Swedish land cover data (Marktäcke, © Lantmäteriet). Panel E shows CORINE land cover types (EEA), note the concentration of agriculture (yellow) in the lowlands around lakes Hjälmaren and Mälaren, and the increasing degree of urbanization (red) towards the east. Panel F shows soil types (© SGU); clay/silt soils (yellow) are almost absent in region 1. For color legend see tables S1, S2.



and relatively little agriculture. Differences between region 2 and region 1 cannot be explained by human population pressure, with the exception of potentially more intensive forestry towards the west. The very low percentage of clay/silt soils and the higher relief might possibly explain why there are relatively fewer wetlands in region 1 (tables S1, S2; Fig. A1, F). According to CORINE land cover data, however, peat bogs should cover a larger area in region 1 (table S1); hence, regional sampling bias in the VMI data might partially cause this pattern.

To quantitatively estimate the regional distribution of ES potential, the VMI data should preferably be integrated with other, higher resolution datasets. A quantitative link from landscape characteristics to wetland type distribution, in conjunction with local vegetation, could then be used to model the spatial distribution of ES potential. While this was not the focus of the present study, it constitutes a natural extension on the regional scale.

**Table S1** Distribution of land cover types across the NDB, as percent cover in each region.

| Land cover type                                                                                                                      | Region 1   | Region 2    | Region 3    | Region 4    | Region 5    |
|--------------------------------------------------------------------------------------------------------------------------------------|------------|-------------|-------------|-------------|-------------|
|  <b>Urban fabric, industrial, transport, mining</b> | <b>0.7</b> | <b>3.2</b>  | <b>6.5</b>  | <b>4.9</b>  | <b>14.2</b> |
|  <b>Agricultural</b>                                | <b>0.2</b> | <b>12.4</b> | <b>39.3</b> | <b>27.1</b> | <b>25.1</b> |
|  Pastures                                           | 0.0        | 0.3         | 0.7         | 0.6         | 1.0         |
|  Forest                                             | 82.8       | 68.2        | 41.4        | 57.1        | 37.2        |
|  Transitional woodland-shrub                       | 11.4       | 7.9         | 3.3         | 9.7         | 2.2         |
|  Inland marshes                                   | 0.0        | 0.2         | 0.4         | 0.5         | 0.4         |
|  <b>Peat bogs</b>                                 | <b>1.4</b> | <b>1.2</b>  | <b>0.6</b>  | <b>0.5</b>  | <b>0.1</b>  |
|  Water bodies                                     | 3.7        | 8.0         | 10.4        | 1.6         | 25.5        |

**Table S2** Distribution of soil types across the NDB, as percent cover in each region. The small percentage of clay/silt soil in region 1 might contribute to the smaller number of wetlands as compared to region 2.

| Soil class                                                                                                        | Region 1   | Region 2    | Region 3    | Region 4    | Region 5    |
|-------------------------------------------------------------------------------------------------------------------|------------|-------------|-------------|-------------|-------------|
|  Till, sandy till, clay-till   | 76.6       | 61.2        | 42.4        | 59.4        | 41.3        |
|  Esker, sorted sand and gravel | 3.2        | 5.2         | 5.6         | 3.6         | 4.4         |
|  Peat                          | 4.1        | 3.5         | 3.1         | 5.3         | 1.7         |
|  Sorted sand and gravel        | 1.5        | 2.3         | 3.2         | 0.7         | 1.7         |
|  <b>Clay, silt</b>             | <b>0.1</b> | <b>15.8</b> | <b>28.9</b> | <b>18.9</b> | <b>12.6</b> |
|  Bedrock                       | 14.2       | 9.9         | 8.4         | 11.5        | 16.5        |

Belgrano, A., A.P. Allen, B.J. Enquist, and J.F. Gillooly. 2002. Allometric scaling of maximum population density: a common rule for marine phytoplankton and terrestrial plants. *Ecology Letters* 5: 611–613.

Elith, J., C.H. Graham, R.P. Anderson, M. Dudík, M., S. Ferrier, A. Guisan, R.J. Hijmans, F. Huettmann, et al. 2006. Novel methods improve prediction of species' distributions from occurrence data. *Ecography* 29: 129–151.

Elith, J., and J.R. Leathwick. 2009. Species Distribution Models: Ecological Explanation and Prediction Across Space and Time. *Annual Review of Ecology, Evolution, and Systematics* 40: 677–697.

Elith, J., S.J. Phillips, T. Hastie, M. Dudík, Y.E. Chee, and C.J. Yates. 2011. A statistical explanation of MaxEnt for ecologists. *Diversity and Distributions* 17: 43–57.

Gunnarsson, U., and M. Löfroth. 2009. Våtmarksinventeringen – resultat från 25 års inventeringar. Nationell slutrapport för våtmarksinventeringen (VMI) i Sverige. Stockholm SEPA: Rapport 5925.

Hijmans, R.J., S.E. Cameron, J.L. Parra, P.G. Jones, and A. Jarvis. 2005. Very high resolution interpolated climate surfaces for global land areas. *International Journal of Climatology* 25:1965–1978. Retrieved October 10, 2013, from [www.worldclim.org](http://www.worldclim.org)

Mitsch, W.J., and J.G. Gosselink. 2000. The value of wetlands: importance of scale and landscape setting. *Ecological*

Moor H., K. Hylander, and J. Norberg (2015)

*Economics* 35: 25-33.

Niklas, K.J., and B.J. Enquist. 2001. Invariant scaling relationships for interspecific plant biomass production rates and body size. *Proceedings of the National Academy of Sciences of the United States of America* 98: 2922–7.

Phillips, S.J., R.P. Anderson, and R.E. Schapire. 2006. Maximum entropy modeling of species geographic distributions. *Ecological Modelling* 190: 231–259.

Phillips, S., and M. Dudík. 2008. Modeling of species distributions with Maxent: new extensions and a comprehensive evaluation. *Ecography* 31: 161–175.

Swedish National Land Survey (Lantmäteriet). 2010. GSD-Höjddata, Grid 50+.© Lantmäteriet, i2012/899

Swedish University of Agricultural Sciences (SLU). 2013.

Swedish Geological Survey (SGU). Retrieved November 30, 2013, from [www.sgu.se/sgu/sv/produkter-tjanster/databaser](http://www.sgu.se/sgu/sv/produkter-tjanster/databaser)

## Trait data for vascular plants

**Table S3** Complete set of trait data used for vascular plants (n=69). Asterisks indicate values estimated using PhyloPars (Bruggeman et al. 2008; only root depth, n=40). PhyloPars provides a statistically consistent method of combining empirical observations with a phylogenetic tree to arrive at a complete set of estimates for missing trait values. Since rapid trait divergence can occur even for closely related species, especially when adapting to extreme habitats such as wetlands, we made all efforts to keep the number of estimates obtained via PhyloPars as low as possible. We restricted its use to the estimation of root depth, albeit at high numbers in that case. Root depth values should therefore be viewed with caution.

| Species                        | PFG          | SLA<br>(mm <sup>2</sup> mg <sup>-1</sup> ) | Canopy<br>height (m) | Root depth<br>(cm) | Leaf<br>persistence | Clonal form | Mycorrhiza  |
|--------------------------------|--------------|--------------------------------------------|----------------------|--------------------|---------------------|-------------|-------------|
| <i>Agrostis canina</i>         | graminoid    | 27.76                                      | 0.3                  | 13                 | summer              | Rhizomatous | Facultative |
| <i>Agrostis stolonifera</i>    | graminoid    | 30.08                                      | 0.45                 | 65                 | persistent          | Rhizomatous | Facultative |
| <i>Alnus glutinosa</i>         | tree         | 16.41                                      | 14.33                | 241                | summer              | Non-clonal  | Obligatory  |
| <i>Alnus incana</i>            | tree         | 31.53                                      | 14                   | 117                | summer              | Non-clonal  | Obligatory  |
| <i>Andromeda polifolia</i>     | herbaceous   | 9.31                                       | 0.26                 | 76*                | persistent          | Rhizomatous | Obligatory  |
| <i>Betula nana</i>             | shrub        | 11.72                                      | 0.68                 | 133*               | summer              | Rhizomatous | Obligatory  |
| <i>Betula pubescens</i>        | tree         | 14.39                                      | 25                   | 30                 | summer              | Non-clonal  | Obligatory  |
| <i>Calamagrostis canescens</i> | graminoid    | 6.91                                       | 1                    | 93*                | summer              | Rhizomatous | Facultative |
| <i>Calamagrostis purpurea</i>  | graminoid    | 23.88                                      | 1.15                 | 90*                | summer              | Rhizomatous | Non-myc     |
| <i>Calla palustris</i>         | herbaceous   | 32.82                                      | 0.15                 | 39*                | summer              | NA          | Non-myc     |
| <i>Calluna vulgaris</i>        | shrub        | 10.92                                      | 0.83                 | 58                 | persistent          | Non-clonal  | Obligatory  |
| <i>Caltha palustris</i>        | herbaceous   | 19                                         | 0.26                 | 54                 | summer              | Non-clonal  | Facultative |
| <i>Carex acuta</i>             | graminoid    | 15.61                                      | 0.9                  | 78*                | summer              | Rhizomatous | Non-myc     |
| <i>Carex aquatilis</i>         | graminoid    | 14.61                                      | 1                    | 80*                | persistent          | Rhizomatous | Non-myc     |
| <i>Carex canescens</i>         | graminoid    | 28.45                                      | 0.32                 | 57*                | summer              | Rhizomatous | Non-myc     |
| <i>Carex chondorrhiza</i>      | graminoid    | 21.84                                      | 0.1                  | 71*                | summer              | Rhizomatous | Non-myc     |
| <i>Carex lasiocarpa</i>        | graminoid    | 10.44                                      | 0.65                 | 67*                | persistent          | Rhizomatous | Facultative |
| <i>Carex limosa</i>            | graminoid    | 26.6                                       | 0.32                 | 66*                | persistent          | Rhizomatous | Non-myc     |
| <i>Carex magellanica</i>       | graminoid    | 25.87                                      | 0.14                 | 62*                | summer              | Rhizomatous | Facultative |
| <i>Carex nigra</i>             | graminoid    | 20.13                                      | 0.11                 | 56                 | summer              | Rhizomatous | Facultative |
| <i>Carex rostrata</i>          | graminoid    | 15.33                                      | 0.5                  | 66*                | persistent          | Rhizomatous | Non-myc     |
| <i>Carex vesicaria</i>         | graminoid    | 18.39                                      | 0.55                 | 126                | summer              | Rhizomatous | Facultative |
| <i>Cirsium palustre</i>        | herbaceous   | 15.61                                      | 0.85                 | 142                | persistent          | Non-clonal  | Facultative |
| <i>Deschampsia cespitosa</i>   | graminoid    | 11.87                                      | 0.43                 | 123                | persistent          | Tussock     | Facultative |
| <i>Drosera intermedia</i>      | herbaceous   | 28.51                                      | 0.04                 | 18*                | summer              | Non-clonal  | Facultative |
| <i>Drosera rotundifolia</i>    | herbaceous   | 42.92                                      | 0.08                 | 22*                | summer              | Non-clonal  | Facultative |
| <i>Empetrum hermaphroditum</i> | shrub        | 6.0256                                     | 0.2                  | 77*                | persistent          | Rhizomatous | Obligatory  |
| <i>Empetrum nigrum</i>         | shrub        | 8.4                                        | 0.15                 | 77*                | persistent          | Rhizomatous | Obligatory  |
| <i>Equisetum fluviatile</i>    | pteridophyte | 9.45                                       | 1                    | 107*               | summer              | Rhizomatous | Non-myc     |
| <i>Equisetum palustre</i>      | pteridophyte | 8.62                                       | 0.3                  | 250                | summer              | Rhizomatous | Non-myc     |

|                          |              |       |      |      |            |             |             |
|--------------------------|--------------|-------|------|------|------------|-------------|-------------|
| Equisetum sylvaticum     | pteridophyte | 24.75 | 0.32 | 141* | summer     | Rhizomatous | Facultative |
| Erica tetralix           | shrub        | 11.82 | 0.44 | 79*  | persistent | Rhizomatous | Obligatory  |
| Eriophorum angustifolium | graminoid    | 10.46 | 0.2  | 121  | persistent | Rhizomatous | Facultative |
| Eriophorum vaginatum     | graminoid    | 11.99 | 0.43 | 61   | persistent | Tussock     | Facultative |
| Filipendula ulmaria      | herbaceous   | 14.66 | 0.79 | 62   | summer     | Rhizomatous | Facultative |
| Glyceria maxima          | graminoid    | 19.79 | 1.3  | 83*  | summer     | Rhizomatous | Facultative |
| Iris pseudacorus         | herbaceous   | 13.65 | 0.75 | 203* | summer     | Rhizomatous | Facultative |
| Juncus effusus           | graminoid    | 7.79  | 0.9  | 81   | persistent | Tussock     | Facultative |
| Juncus filiformis        | graminoid    | 9.83  | 0.3  | 71   | persistent | Tussock     | Facultative |
| Lycopus europeus         | herbaceous   | 63.35 | 0.57 | 60*  | summer     | Rhizomatous | Facultative |
| Lysimachia thyrsoiflora  | herbaceous   | 38.09 | 0.42 | 50*  | summer     | Rhizomatous | Facultative |
| Lysimachia vulgaris      | herbaceous   | 17.3  | 0.9  | 89   | summer     | Rhizomatous | Facultative |
| Lythrum salicaria        | herbaceous   | 23.13 | 0.71 | 64   | summer     | Non-clonal  | Facultative |
| Menyanthes trifoliata    | herbaceous   | 21.58 | 0.18 | 94*  | summer     | Rhizomatous | Facultative |
| Molinia caerulea         | graminoid    | 19.72 | 0.79 | 96   | summer     | Tussock     | Obligatory  |
| Myrica gale              | shrub        | 11.56 | 1.22 | 120* | summer     | Rhizomatous | Facultative |
| Narthecium ossifragum    | herbaceous   | 24.15 | 0.16 | 22   | persistent | Rhizomatous | Facultative |
| Phalaris arundinacea     | graminoid    | 20.16 | 1.45 | 139  | summer     | Rhizomatous | Facultative |
| Phragmites australis     | graminoid    | 13.51 | 2.5  | 104* | summer     | Rhizomatous | Facultative |
| Picea abies              | tree         | 17.2  | 50   | 103  | persistent | Non-clonal  | Obligatory  |
| Pinus sylvestris         | tree         | 3.78  | 34.5 | 243  | persistent | Non-clonal  | Obligatory  |
| Potentilla palustris     | herbaceous   | 19.06 | 0.35 | 86*  | summer     | Rhizomatous | Facultative |
| Rhododendron tomentosum  | shrub        | 10.59 | 1.02 | 73*  | persistent | NA          | Obligatory  |
| Rhynchospora alba        | graminoid    | 16.68 | 0.25 | 70*  | summer     | Rhizomatous | Non-myc     |
| Rubus chamaemorus        | herbaceous   | 11.35 | 0.1  | 120* | summer     | Rhizomatous | Facultative |
| Salix caprea             | shrub        | 14.83 | 6    | 244  | summer     | Non-clonal  | Obligatory  |
| Salix cinerea            | shrub        | 10.3  | 2.75 | 140  | summer     | Non-clonal  | Obligatory  |
| Salix lapponum           | shrub        | 11    | 0.57 | 171* | summer     | Non-clonal  | Obligatory  |
| Salix repens             | shrub        | 20.18 | 1.05 | 172* | summer     | Rhizomatous | Obligatory  |
| Scheuchzeria palustris   | herbaceous   | 9.78  | 0.15 | 80*  | summer     | Rhizomatous | Non-myc     |
| Schoenus ferrugineus     | graminoid    | 8.69  | 0.22 | 70*  | persistent | Tussock     | Facultative |
| Scirpus sylvaticus       | graminoid    | 19.02 | 0.78 | 170  | persistent | Rhizomatous | Non-myc     |
| Trichophorum cespitosum  | graminoid    | 13.19 | 0.25 | 78*  | summer     | Tussock     | Facultative |
| Typha latifolia          | graminoid    | 9.37  | 1.5  | 120* | summer     | Rhizomatous | Facultative |
| Vaccinium myrtillus      | shrub        | 24.76 | 0.31 | 81*  | summer     | Rhizomatous | Obligatory  |
| Vaccinium oxycoccos      | shrub        | 13.36 | 0.39 | 13*  | persistent | Rhizomatous | Obligatory  |
| Vaccinium uliginosum     | shrub        | 14.73 | 0.29 | 82*  | summer     | Rhizomatous | Obligatory  |
| Viola palustris          | herbaceous   | 39.79 | 0.08 | 11   | persistent | Rhizomatous | Facultative |

Primary and secondary sources were

Specific Leaf Area (SLA): LEDA (Kleyer et al. 2008);

Canopy Height (CH): LEDA, Grime et al. 2007, PLANTATT (Hill et al. 2004);

Root depth (RD): Kutschera 1960, kindly provided by K. Metselaar (Metselaar et al. 2009);

Leaf persistence: BiolFlor (Klotz et al. 2002);

Clonality form: Ecoflora (Fitter and Peat 1994);

Mycorrhiza: Hempel et al. 2013, Akhmetzhanova et al. 2012.

Akhmetzhanova, A. A., N.A. Soudzilovskaia, V.G. Onipchenko, W.K. Cornwell, V.A. Agafonov, I.A. Selivanov, and J.H.C. Cornelissen. 2012. A rediscovered treasure: mycorrhizal intensity database for 3000 vascular plants species across the former Soviet Union. *Ecology* 93:689.

Hempel, S., L. Götzenberger, I. Kühn, S.G. Michalski, M.C. Rillig, M. Zobel, and M. Moora. 2013. Mycorrhizas in the Central European Flora: relationships with plant life history traits and ecology. *Ecology* 94:1389-1399.

Hill, M.O., C.D. Preston, and D.B. Roy. 2004. *PLANTATT – Attributes of British and Irish Plants: Status, Size, Life History, Geography and Habitats*. NERC. Cambridgeshire: Raven Marketing Group.

Fitter, A.H., and H.J. Peat. 1994. The Ecological Flora Database. *Journal of Ecology* 82: 415-425. Retrieved from [www.ecoflora.co.uk](http://www.ecoflora.co.uk)

Grime, J.P., J.G. Hodgson, and R. Hunt. 2007. *Comparative Plant Ecology: a functional approach to common British species*. 2e. Colvend: Castlepoint Press.

Moor H., K. Hylander, and J. Norberg (2015)

Kleyer, M., R.M. Bekker, I.C. Knevel, J.P. Bakker, K. Thompson, M. Sonnenschein, P. Poschlod, J.M. van Groenendael, et al. 2008. The LEDA Traitbase: a database of life-history traits of the Northwest European flora. *Journal of Ecology* 96: 1266-1274.

Klotz, S., I. Kühn, and W. Durka. 2002. Eine Datenbank zu biologisch-ökologischen Merkmalen der Gefäßpflanzen in Deutschland. Bonn.. Bundesamt für Naturschutz.

Kutschera, L. 1960. *Wurzelatlas mitteleuropäischer Ackerunkräuter und Kulturpflanzen*. Frankfurt am Main: DLG.

Metselaar, K., M. Sobotik, D. Haas, Q. de Jong van Lier, and L. Mommer. 2009. Rooting profiles with depth – the case of the Wurzelatlas mitteleuropäischer Ackerunkräuter und Kulturpflanzen. Vienna: International Symposium “Root Research and Applications”.

### Species list and trait data for hydrophytes.

**Table S4** Species list and traits of hydrophytes (n=17), modelled as separate functional group assumed to occupy primarily flowing water bodies in riparian wetlands. Two categorical traits were used: Space occupancy is derived from an index calculated as (height+lateral spread)/2 (cm), where small corresponds to <10cm, medium 100-100 cm, large >100cm); it indicates size/ biomass, or space occupancy. Body flexibility describes the degree of deformation under water flow pressure, where rigid corresponds to yielding of <45°, elastic 45-300°, and soft >300° (data from Willby et al. 2000).

| Species                         | Occupancy Index | Body flexibility |
|---------------------------------|-----------------|------------------|
| <i>Alisma plantago-aquatica</i> | medium          | elastic          |
| <i>Glyceria fluitans</i>        | medium          | elastic          |
| <i>Hippuris vulgaris</i>        | medium          | elastic          |
| <i>Lemna minor</i>              | small           | rigid            |
| <i>Mentha aquatica</i>          | medium          | rigid            |
| <i>Myosotis scorpioides</i>     | medium          | rigid            |
| <i>Nuphar lutea</i>             | large           | elastic          |
| <i>Nymphaea alba</i>            | large           | elastic          |
| <i>Persicaria amphibia</i>      | large           | elastic          |
| <i>Potamogeton natans</i>       | large           | soft             |
| <i>Ranunculus flammula</i>      | small           | elastic          |
| <i>Schoenoplectus lacustris</i> | large           | elastic          |
| <i>Sium latifolium</i>          | large           | rigid            |
| <i>Sparganium natans</i>        | medium          | elastic          |
| <i>Utricularia intermedia</i>   | medium          | elastic          |
| <i>Utricularia minor</i>        | medium          | elastic          |
| <i>Utricularia vulgaris</i>     | medium          | elastic          |

Willby, N., V.J. Abernethy, and B.O.L. Demars. 2000. Attribute-based classification of European hydrophytes and its relationship to habitat utilization. *Freshwater Biology* 43:43-74

## Electronic Supplementary Material – Results

---

### Species importance for trait change (vascular plants)

Relative impact of the distributional change of each species was assessed by excluding that species from community weighted mean trait (CWMT) value calculations, and then calculating a standardized mean squared error, averaged across the NDB.

Specifically, the difference in CWMT values caused by excluding the species across NDB was calculated, squared, and divided by the number of pixels, according to

$$\text{MSE} = 1/n * \sum(\text{CWM}_{\text{all}} - \text{CWM}_{\text{reduced}})^2$$

MSE was then standardized to yield a contribution coefficient CC according to

$$\text{CC} = \sqrt{\text{MSE} / \text{averageCWM}_{\text{all}}}$$

This was done for each trait to assess the contribution of each species to CWM change in each trait. Here we report the average contribution of vascular plant species across all traits (Table S5).

**Table S5** Vascular plant species contributing most to trait change across all traits across the NDB, separated for wetland type and vegetation layer, and sorted for relative importance (given by the average CC across all traits). The two most important species for change across all traits for field and shrub layers of each wetland type are highlighted in bold typeface; species that showed particularly strong contribution to change in single traits (cf. results section) are additionally highlighted in italics.

| Wetland    | Layer        | Species                               | meanCC      |
|------------|--------------|---------------------------------------|-------------|
| <b>bog</b> | <b>field</b> | <b><i>Eriophorum vaginatum</i></b>    | <b>0.97</b> |
| <b>bog</b> | <b>field</b> | <b><i>Drosera rotundifolia</i></b>    | <b>0.83</b> |
| bog        | field        | Scheuchzeria palustris                | 0.19        |
| <i>bog</i> | <i>field</i> | <i>Andromeda polifolia</i>            | <i>0.16</i> |
| bog        | field        | Carex magellanica                     | 0.15        |
| <i>bog</i> | <i>field</i> | <i>Rhynchospora alba</i>              | <i>0.09</i> |
| bog        | field        | Carex limosa                          | 0.09        |
| bog        | field        | Rubus chamaemorus                     | 0.07        |
| bog        | field        | Trichophorum cespitosum               | 0.06        |
| <b>bog</b> | <b>shrub</b> | <b><i>Rhododendron tomentosum</i></b> | <b>2.89</b> |
| <b>bog</b> | <b>shrub</b> | <b><i>Vaccinium myrtillus</i></b>     | <b>0.80</b> |
| bog        | shrub        | Calluna vulgaris                      | 0.53        |
| <i>bog</i> | <i>shrub</i> | <i>Betula nana</i>                    | <i>0.42</i> |
| bog        | shrub        | Empetrum nigrum                       | 0.14        |
| bog        | shrub        | Vaccinium uliginosum                  | 0.11        |
| bog        | shrub        | Empetrum hermaphroditum               | 0.08        |
| bog        | shrub        | Vaccinium oxycoccos                   | 0.07        |
| bog        | shrub        | Erica tetralix                        | 0.02        |
| <b>fen</b> | <b>field</b> | <b><i>Phragmites australis</i></b>    | <b>0.85</b> |
| <b>fen</b> | <b>field</b> | <b><i>Phalaris arundinacea</i></b>    | <b>0.72</b> |
| <i>fen</i> | <i>field</i> | <i>Carex lasiocarpa</i>               | <i>0.37</i> |
| fen        | field        | Carex limosa                          | 0.29        |
| fen        | field        | Carex canescens                       | 0.27        |

|            |              |                             |             |
|------------|--------------|-----------------------------|-------------|
| fen        | field        | Schoenus ferrugineus        | 0.26        |
| fen        | field        | Equisetum sylvaticum        | 0.25        |
| fen        | field        | Molinia caerulea            | 0.23        |
| fen        | field        | Trichophorum cespitosum     | 0.13        |
| fen        | field        | Equisetum fluviatile        | 0.12        |
| fen        | field        | Carex magellanica           | 0.12        |
| fen        | field        | Carex vesicaria             | 0.12        |
| fen        | field        | Menyanthes trifoliata       | 0.09        |
| <i>fen</i> | <i>field</i> | <i>Agrostis canina</i>      | <i>0.08</i> |
| fen        | field        | Potentilla palustris        | 0.08        |
| fen        | field        | Carex chordorrhiza          | 0.06        |
| fen        | field        | Eriophorum angustifolium    | 0.06        |
| fen        | field        | Viola palustris             | 0.05        |
| fen        | field        | Carex rostrata              | 0.04        |
| fen        | field        | Carex nigra                 | 0.03        |
| fen        | field        | Drosera intermedia          | 0.02        |
| fen        | field        | Narthecium ossifragum       | 0.01        |
| <b>fen</b> | <b>shrub</b> | <b>Salix repens</b>         | <b>0.65</b> |
| <b>fen</b> | <b>shrub</b> | <b>Myrica gale</b>          | <b>0.43</b> |
| fen        | shrub        | Calluna vulgaris            | 0.21        |
| fen        | shrub        | Betula nana                 | 0.20        |
| fen        | shrub        | Salix lapponum              | 0.09        |
| fen        | shrub        | Vaccinium oxycoccos         | 0.08        |
| <b>rip</b> | <b>field</b> | <b>Phragmites australis</b> | <b>1.08</b> |
| <b>rip</b> | <b>field</b> | <b>Equisetum palustre</b>   | <b>0.22</b> |
| rip        | field        | Carex rostrata              | 0.20        |
| rip        | field        | Glyceria maxima             | 0.17        |
| <i>rip</i> | <i>field</i> | <i>Agrostis stolonifera</i> | <i>0.15</i> |
| <i>rip</i> | <i>field</i> | <i>Typha latifolia</i>      | <i>0.14</i> |
| rip        | field        | Equisetum sylvaticum        | 0.12        |
| rip        | field        | Phalaris arundinacea        | 0.12        |
| <i>rip</i> | <i>field</i> | <i>Lycopus europaeus</i>    | <i>0.11</i> |
| rip        | field        | Scirpus sylvaticus          | 0.10        |
| rip        | field        | Juncus filiformis           | 0.10        |
| rip        | field        | Lysimachia thyrsoiflora     | 0.08        |
| rip        | field        | Caltha palustris            | 0.08        |
| rip        | field        | Iris pseudacorus            | 0.07        |
| rip        | field        | Carex vesicaria             | 0.07        |
| <i>rip</i> | <i>field</i> | <i>Lysimachia vulgaris</i>  | <i>0.07</i> |
| rip        | field        | Calamagrostis canescens     | 0.07        |
| rip        | field        | Carex acuta                 | 0.06        |
| rip        | field        | Potentilla palustris        | 0.06        |
| rip        | field        | Carex canescens             | 0.06        |
| rip        | field        | Lythrum salicaria           | 0.06        |
| rip        | field        | Cirsium palustre            | 0.05        |
| rip        | field        | Deschampsia cespitosa       | 0.05        |
| rip        | field        | Equisetum fluviatile        | 0.05        |
| rip        | field        | Calla palustris             | 0.04        |
| rip        | field        | Filipendula ulmaria         | 0.04        |
| rip        | field        | Juncus effusus              | 0.03        |
| rip        | field        | Carex aquatilis             | 0.01        |
| rip        | field        | Calamagrostis purpurea      | 0.01        |
| <b>rip</b> | <b>shrub</b> | <b>Salix cinerea</b>        | <b>7.48</b> |
| <b>rip</b> | <b>shrub</b> | <b>Salix caprea</b>         | <b>7.37</b> |
| rip        | shrub        | Myrica gale                 | 1.18        |
| rip        | shrub        | Salix lapponum              | 0.55        |



**Predicted change in relative biomass of species (vascular plants)**

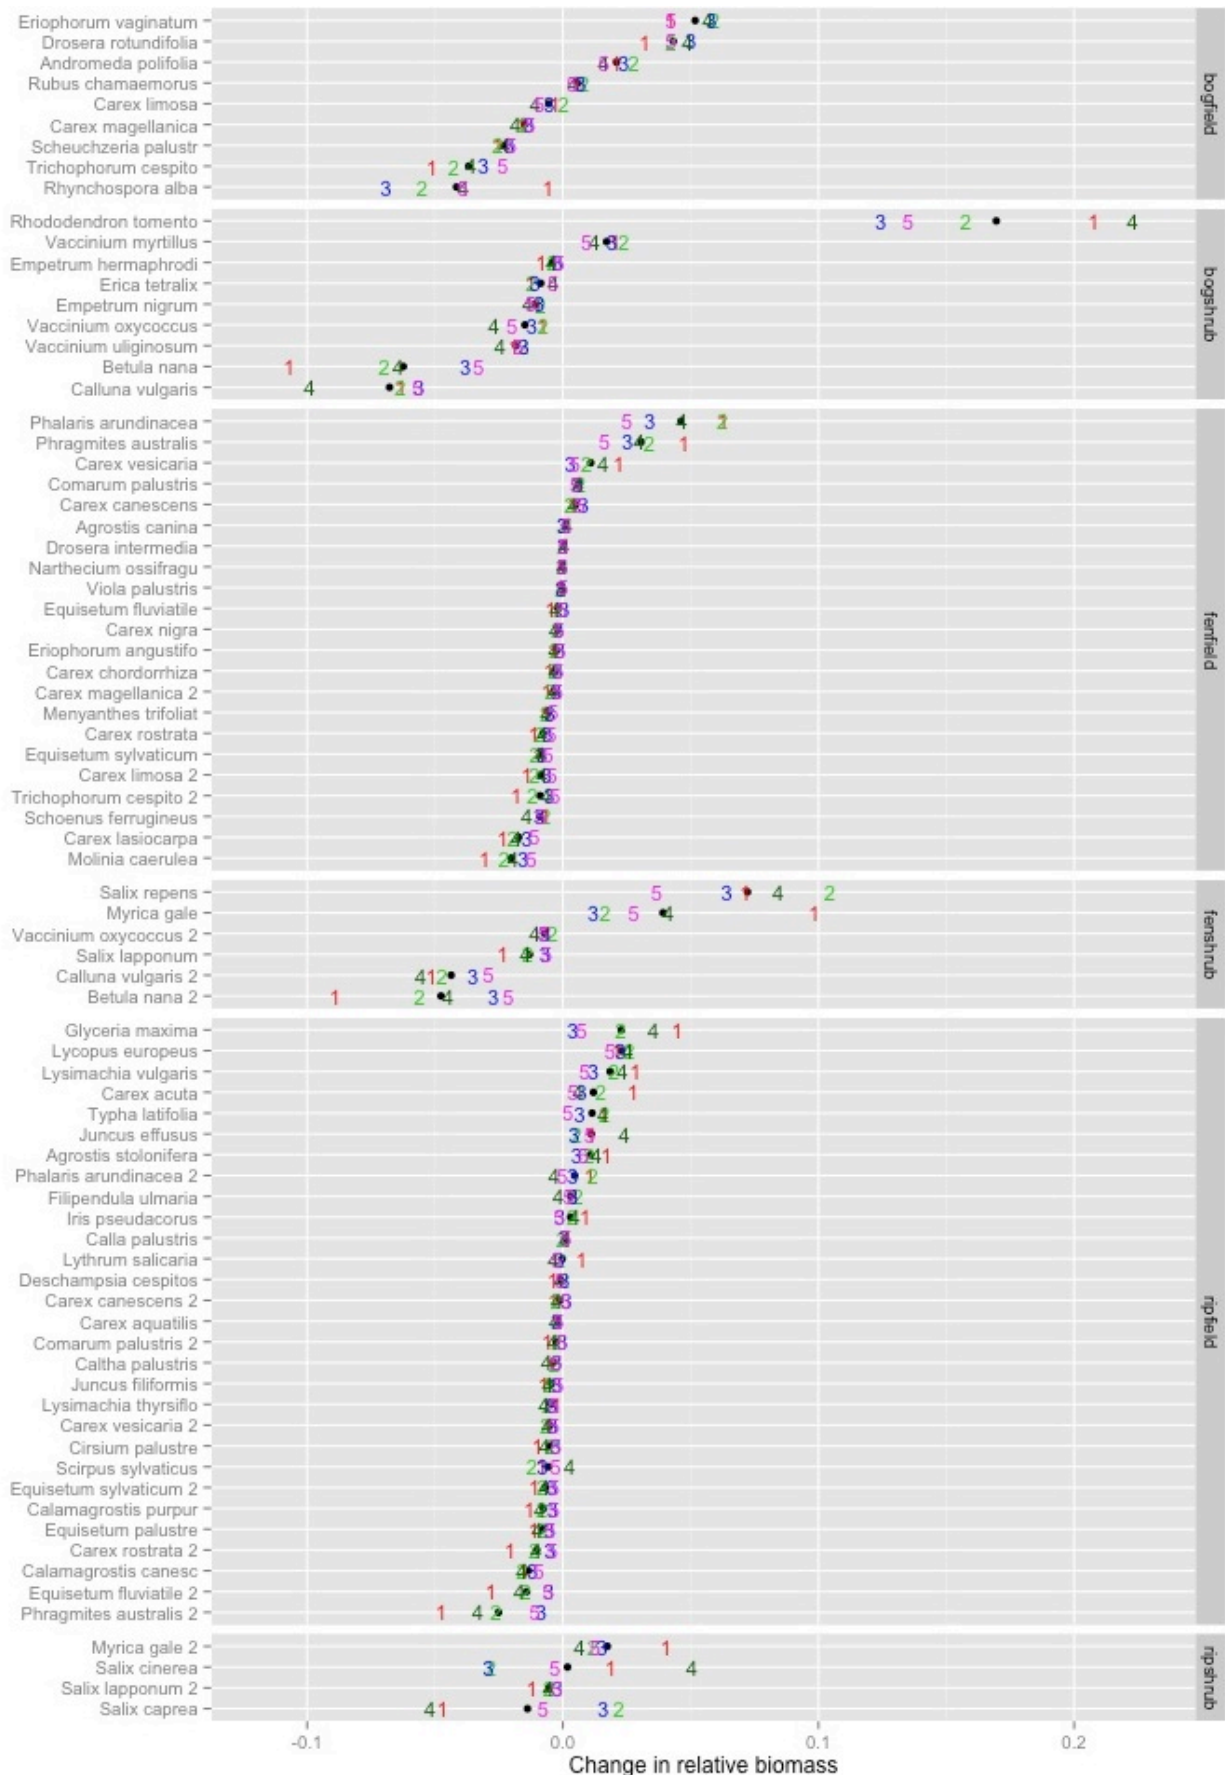

**Fig. S2** (previous page) Proportional shifts in relative biomass of vascular plants in field and shrub layers of the three wetland types. Black dots indicate the overall mean across the NDB, and colored numbers show the average change in each of the five regions.

Note that changes in species proportions of community biomass are relatively larger where species lists are shorter. This drawback of our approach might be less pronounced with more extensive species lists, but we believe our species selection covers those species that collectively dominate community biomass. To resolve this issue, field data on realized relative biomass across both field and shrub layers (and potentially even mosses and trees) would be required.

### Strongest change in predicted distribution of bryophytes in the NDB

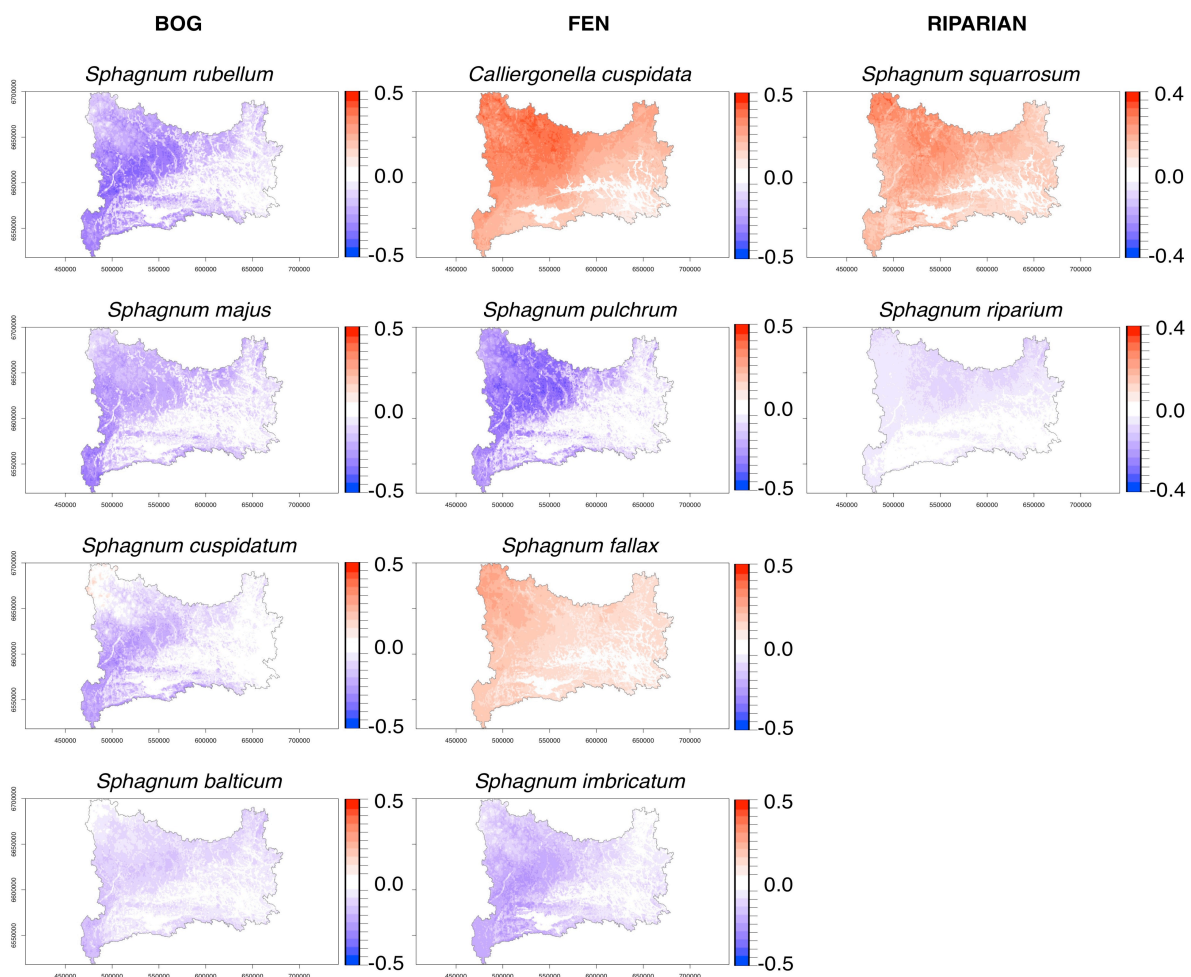

**Fig. S3** Strongest predicted change in abundance distribution of bryophytes in the NDB for the three wetland types. Blue indicates decrease, red increase. The scale shows change in suitability relative to current suitability (between 0 and 1).

**Absolute values of community weighted mean trait values, current and future predicted****Table S6** Absolute CMWT values for continuous traits specific leaf area (SLA), canopy height (CH), and root depth (RD) at the times current and future for field and shrub layers in the three wetland types, averaged in the five regions. These average values are the basis for calculation of percent change shown in figures in the main text.

| Time    | Trait | Wetland type | Vegetation layer | Unit                             | Region 1 | Region 2 | Region 3 | Region 4 | Region 5 |
|---------|-------|--------------|------------------|----------------------------------|----------|----------|----------|----------|----------|
| Current | SLA   | Bog          | Field            | mm <sup>2</sup> mg <sup>-1</sup> | 16.58    | 16.88    | 17.33    | 17.37    | 17.41    |
| Current | SLA   | Bog          | Shrub            | mm <sup>2</sup> mg <sup>-1</sup> | 12.69    | 12.71    | 12.74    | 12.93    | 12.93    |
| Current | SLA   | Fen          | Field            | mm <sup>2</sup> mg <sup>-1</sup> | 16.68    | 16.89    | 16.98    | 16.83    | 16.96    |
| Current | SLA   | Fen          | Shrub            | mm <sup>2</sup> mg <sup>-1</sup> | 13.37    | 14.09    | 15.06    | 14.99    | 15.51    |
| Current | SLA   | Riparian     | Field            | mm <sup>2</sup> mg <sup>-1</sup> | 15.84    | 16.29    | 16.59    | 16.38    | 16.71    |
| Current | SLA   | Riparian     | Shrub            | mm <sup>2</sup> mg <sup>-1</sup> | 12.56    | 12.66    | 12.75    | 13.28    | 13.01    |
| Current | CH    | Bog          | Field            | m                                | 0.28     | 0.28     | 0.28     | 0.28     | 0.28     |
| Current | CH    | Bog          | Shrub            | m                                | 0.64     | 0.68     | 0.70     | 0.66     | 0.69     |
| Current | CH    | Fen          | Field            | m                                | 1.12     | 1.17     | 1.23     | 1.20     | 1.26     |
| Current | CH    | Fen          | Shrub            | m                                | 0.92     | 0.96     | 1.00     | 0.97     | 0.99     |
| Current | CH    | Riparian     | Field            | m                                | 1.11     | 1.08     | 1.07     | 1.09     | 1.08     |
| Current | CH    | Riparian     | Shrub            | m                                | 3.96     | 4.10     | 4.24     | 4.62     | 4.46     |
| Current | RD    | Bog          | Field            | cm                               | 69.78    | 68.86    | 67.36    | 67.64    | 67.06    |
| Current | RD    | Bog          | Shrub            | cm                               | 69.63    | 67.69    | 66.30    | 66.98    | 65.94    |
| Current | RD    | Fen          | Field            | cm                               | 94.00    | 95.98    | 99.31    | 98.21    | 100.65   |
| Current | RD    | Fen          | Shrub            | cm                               | 106.08   | 112.89   | 122.75   | 120.62   | 126.05   |
| Current | RD    | Riparian     | Field            | cm                               | 105.12   | 104.37   | 104.87   | 105.19   | 105.39   |
| Current | RD    | Riparian     | Shrub            | cm                               | 184.56   | 187.70   | 191.21   | 203.44   | 197.66   |
| Future  | SLA   | Bog          | Field            | mm <sup>2</sup> mg <sup>-1</sup> | 17.22    | 17.66    | 18.24    | 18.24    | 18.19    |
| Future  | SLA   | Bog          | Shrub            | mm <sup>2</sup> mg <sup>-1</sup> | 12.78    | 12.88    | 12.87    | 12.87    | 12.91    |
| Future  | SLA   | Fen          | Field            | mm <sup>2</sup> mg <sup>-1</sup> | 16.75    | 16.93    | 17.07    | 17.00    | 17.10    |
| Future  | SLA   | Fen          | Shrub            | mm <sup>2</sup> mg <sup>-1</sup> | 14.00    | 15.01    | 15.62    | 15.74    | 15.83    |
| Future  | SLA   | Riparian     | Field            | mm <sup>2</sup> mg <sup>-1</sup> | 17.42    | 17.68    | 17.73    | 17.72    | 17.70    |
| Future  | SLA   | Riparian     | Shrub            | mm <sup>2</sup> mg <sup>-1</sup> | 12.39    | 12.77    | 12.84    | 13.05    | 12.99    |
| Future  | CH    | Bog          | Field            | m                                | 0.28     | 0.28     | 0.28     | 0.29     | 0.28     |
| Future  | CH    | Bog          | Shrub            | m                                | 0.72     | 0.73     | 0.75     | 0.75     | 0.74     |
| Future  | CH    | Fen          | Field            | m                                | 1.28     | 1.30     | 1.32     | 1.31     | 1.31     |
| Future  | CH    | Fen          | Shrub            | m                                | 1.00     | 1.00     | 1.02     | 1.02     | 1.02     |
| Future  | CH    | Riparian     | Field            | m                                | 1.08     | 1.07     | 1.07     | 1.07     | 1.07     |
| Future  | CH    | Riparian     | Shrub            | m                                | 3.77     | 4.16     | 4.28     | 4.45     | 4.42     |
| Future  | RD    | Bog          | Field            | cm                               | 67.74    | 66.38    | 64.58    | 64.76    | 64.68    |
| Future  | RD    | Bog          | Shrub            | cm                               | 64.40    | 64.77    | 65.44    | 65.91    | 65.77    |
| Future  | RD    | Fen          | Field            | cm                               | 99.26    | 100.48   | 101.69   | 101.86   | 102.31   |
| Future  | RD    | Fen          | Shrub            | cm                               | 111.32   | 120.28   | 128.31   | 128.30   | 130.01   |
| Future  | RD    | Riparian     | Field            | cm                               | 100.89   | 101.46   | 102.23   | 102.36   | 102.88   |
| Future  | RD    | Riparian     | Shrub            | cm                               | 178.50   | 189.57   | 192.48   | 197.74   | 196.55   |

**Table S7** Absolute values for proportions of levels of the categorical traits plant functional group (PFG), Leaf persistence, clonal growth form, and mycorrhizal association modeled for present, for field and shrub layers in the three wetland types, averaged in the five regions. These average values are the basis for calculation of percent change shown in figures in the main text.

| Time    | Trait            | Wetland type | Vegetation layer | Trait level  | Region 1 | Region 2 | Region 3 | Region 4 | Region 5 |
|---------|------------------|--------------|------------------|--------------|----------|----------|----------|----------|----------|
| Current | PFG              | Bog          | Field            | herbaceous   | 0.22     | 0.24     | 0.28     | 0.29     | 0.32     |
| Current | PFG              | Fen          | Field            | graminoid    | 0.80     | 0.80     | 0.81     | 0.81     | 0.82     |
| Current | PFG              | Fen          | Field            | herbaceous   | 0.07     | 0.07     | 0.07     | 0.07     | 0.07     |
| Current | PFG              | Fen          | Field            | pteridophyte | 0.13     | 0.12     | 0.11     | 0.12     | 0.12     |
| Current | PFG              | Riparian     | Field            | graminoid    | 0.66     | 0.66     | 0.66     | 0.64     | 0.65     |
| Current | PFG              | Riparian     | Field            | herbaceous   | 0.24     | 0.26     | 0.28     | 0.28     | 0.29     |
| Current | PFG              | Riparian     | Field            | pteridophyte | 0.10     | 0.08     | 0.06     | 0.08     | 0.06     |
| Current | Leaf persistence | Bog          | Field            | persistent   | 0.50     | 0.53     | 0.57     | 0.59     | 0.60     |
| Current | Leaf persistence | Bog          | Field            | summergreen  | 0.50     | 0.47     | 0.43     | 0.41     | 0.40     |
| Current | Leaf persistence | Bog          | Shrub            | persistent   | 0.70     | 0.74     | 0.78     | 0.73     | 0.77     |
| Current | Leaf persistence | Bog          | Shrub            | summergreen  | 0.30     | 0.26     | 0.22     | 0.27     | 0.23     |
| Current | Leaf persistence | Fen          | Field            | persistent   | 0.22     | 0.18     | 0.15     | 0.17     | 0.14     |
| Current | Leaf persistence | Fen          | Field            | summergreen  | 0.78     | 0.82     | 0.85     | 0.83     | 0.86     |
| Current | Leaf persistence | Fen          | Shrub            | persistent   | 0.35     | 0.31     | 0.24     | 0.28     | 0.23     |
| Current | Leaf persistence | Fen          | Shrub            | summergreen  | 0.65     | 0.69     | 0.76     | 0.72     | 0.77     |

|         |                    |          |       |              |      |      |      |      |      |
|---------|--------------------|----------|-------|--------------|------|------|------|------|------|
| Current | Leaf persistence   | Riparian | Field | persistent   | 0.24 | 0.23 | 0.22 | 0.19 | 0.20 |
| Current | Leaf persistence   | Riparian | Field | summergreen  | 0.76 | 0.77 | 0.78 | 0.81 | 0.80 |
| Current | Leaf persistence   | Riparian | Shrub | summergreen  | 1.00 | 1.00 | 1.00 | 1.00 | 1.00 |
| Current | Clonal growth form | Bog      | Field | Rhizomatous  | 0.61 | 0.61 | 0.58 | 0.57 | 0.58 |
| Current | Clonal growth form | Bog      | Field | Non-clonal   | 0.04 | 0.06 | 0.08 | 0.08 | 0.09 |
| Current | Clonal growth form | Bog      | Field | Rhizomatous  | 0.34 | 0.34 | 0.34 | 0.35 | 0.33 |
| Current | Clonal growth form | Fen      | Field | Rhizomatous  | 0.87 | 0.90 | 0.92 | 0.91 | 0.92 |
| Current | Clonal growth form | Fen      | Field | Non-clonal   | 0.00 | 0.00 | 0.00 | 0.00 | 0.00 |
| Current | Clonal growth form | Fen      | Field | Rhizomatous  | 0.13 | 0.10 | 0.08 | 0.09 | 0.07 |
| Current | Clonal growth form | Riparian | Field | Rhizomatous  | 0.82 | 0.82 | 0.82 | 0.83 | 0.83 |
| Current | Clonal growth form | Riparian | Field | Non-clonal   | 0.09 | 0.09 | 0.09 | 0.10 | 0.10 |
| Current | Clonal growth form | Riparian | Field | Rhizomatous  | 0.09 | 0.08 | 0.08 | 0.06 | 0.07 |
| Current | Mycorrhiza         | Bog      | Field | Obligatory   | 0.13 | 0.14 | 0.15 | 0.16 | 0.18 |
| Current | Mycorrhiza         | Bog      | Field | non-myc.     | 0.39 | 0.37 | 0.33 | 0.31 | 0.30 |
| Current | Mycorrhiza         | Bog      | Field | Facultative  | 0.48 | 0.49 | 0.52 | 0.53 | 0.52 |
| Current | Mycorrhiza         | Bog      | Shrub | Obligatory   | 1.00 | 1.00 | 1.00 | 1.00 | 1.00 |
| Current | Mycorrhiza         | Bog      | Field | graminoid    | 0.78 | 0.76 | 0.72 | 0.71 | 0.68 |
| Current | Mycorrhiza         | Fen      | Field | Obligatory   | 0.09 | 0.07 | 0.06 | 0.07 | 0.06 |
| Current | Mycorrhiza         | Fen      | Field | non-myc.     | 0.22 | 0.21 | 0.18 | 0.19 | 0.17 |
| Current | Mycorrhiza         | Fen      | Field | Facultative  | 0.69 | 0.72 | 0.76 | 0.74 | 0.77 |
| Current | Mycorrhiza         | Fen      | Shrub | Obligatory   | 0.69 | 0.67 | 0.68 | 0.74 | 0.72 |
| Current | Mycorrhiza         | Fen      | Shrub | Facultative  | 0.31 | 0.33 | 0.32 | 0.26 | 0.28 |
| Current | Mycorrhiza         | Riparian | Field | non-myc.     | 0.25 | 0.23 | 0.19 | 0.22 | 0.18 |
| Current | Mycorrhiza         | Riparian | Field | Facultative  | 0.75 | 0.77 | 0.81 | 0.78 | 0.82 |
| Current | Mycorrhiza         | Riparian | Shrub | Obligatory   | 0.84 | 0.86 | 0.89 | 0.90 | 0.91 |
| Current | Mycorrhiza         | Riparian | Shrub | Facultative  | 0.16 | 0.14 | 0.11 | 0.10 | 0.09 |
| Future  | PFG                | Bog      | Field | herbaceous   | 0.28 | 0.32 | 0.36 | 0.36 | 0.38 |
| Future  | PFG                | Fen      | Field | graminoid    | 0.82 | 0.82 | 0.82 | 0.82 | 0.82 |
| Future  | PFG                | Fen      | Field | herbaceous   | 0.07 | 0.07 | 0.07 | 0.07 | 0.07 |
| Future  | PFG                | Fen      | Field | pteridophyte | 0.11 | 0.11 | 0.11 | 0.11 | 0.11 |
| Future  | PFG                | Riparian | Field | graminoid    | 0.66 | 0.65 | 0.65 | 0.65 | 0.65 |
| Future  | PFG                | Riparian | Field | herbaceous   | 0.29 | 0.30 | 0.31 | 0.30 | 0.31 |
| Future  | PFG                | Riparian | Field | pteridophyte | 0.05 | 0.05 | 0.04 | 0.05 | 0.04 |
| Future  | Leaf persistence   | Bog      | Field | persistent   | 0.56 | 0.61 | 0.64 | 0.65 | 0.65 |
| Future  | Leaf persistence   | Bog      | Field | summergreen  | 0.44 | 0.39 | 0.36 | 0.35 | 0.35 |
| Future  | Leaf persistence   | Bog      | Shrub | persistent   | 0.80 | 0.81 | 0.81 | 0.81 | 0.81 |
| Future  | Leaf persistence   | Bog      | Shrub | Summergreen  | 0.20 | 0.19 | 0.19 | 0.19 | 0.19 |
| Future  | Leaf persistence   | Fen      | Field | persistent   | 0.15 | 0.13 | 0.12 | 0.12 | 0.11 |
| Future  | Leaf persistence   | Fen      | Field | summergreen  | 0.85 | 0.87 | 0.88 | 0.88 | 0.89 |
| Future  | Leaf persistence   | Fen      | Shrub | persistent   | 0.30 | 0.25 | 0.20 | 0.21 | 0.20 |
| Future  | Leaf persistence   | Fen      | Shrub | Summergreen  | 0.70 | 0.75 | 0.80 | 0.79 | 0.80 |
| Future  | Leaf persistence   | Riparian | Field | persistent   | 0.21 | 0.21 | 0.21 | 0.20 | 0.20 |
| Future  | Leaf persistence   | Riparian | Field | summergreen  | 0.79 | 0.79 | 0.79 | 0.80 | 0.80 |
| Future  | Leaf persistence   | Riparian | Shrub | Summergreen  | 1.00 | 1.00 | 1.00 | 1.00 | 1.00 |
| Future  | Clonal growth form | Bog      | Field | Rhizomatous  | 0.59 | 0.55 | 0.50 | 0.50 | 0.52 |
| Future  | Clonal growth form | Bog      | Field | Non-clonal   | 0.08 | 0.10 | 0.13 | 0.13 | 0.13 |
| Future  | Clonal growth form | Bog      | Field | Rhizomatous  | 0.33 | 0.35 | 0.37 | 0.37 | 0.35 |
| Future  | Clonal growth form | Fen      | Field | Rhizomatous  | 0.92 | 0.94 | 0.95 | 0.95 | 0.95 |
| Future  | Clonal growth form | Fen      | Field | Non-clonal   | 0.00 | 0.00 | 0.00 | 0.00 | 0.00 |
| Future  | Clonal growth form | Fen      | Field | Rhizomatous  | 0.08 | 0.06 | 0.05 | 0.05 | 0.05 |
| Future  | Clonal growth form | Riparian | Field | Rhizomatous  | 0.82 | 0.83 | 0.82 | 0.83 | 0.82 |
| Future  | Clonal growth form | Riparian | Field | Non-clonal   | 0.08 | 0.08 | 0.09 | 0.08 | 0.09 |
| Future  | Clonal growth form | Riparian | Field | Rhizomatous  | 0.09 | 0.08 | 0.08 | 0.08 | 0.08 |
| Future  | Mycorrhiza         | Bog      | Field | Obligatory   | 0.15 | 0.16 | 0.17 | 0.17 | 0.20 |
| Future  | Mycorrhiza         | Bog      | Field | non-myc.     | 0.36 | 0.29 | 0.24 | 0.24 | 0.24 |
| Future  | Mycorrhiza         | Bog      | Field | Facultative  | 0.49 | 0.54 | 0.59 | 0.59 | 0.57 |
| Future  | Mycorrhiza         | Bog      | Shrub | Obligatory   | 1.00 | 1.00 | 1.00 | 1.00 | 1.00 |
| Future  | Mycorrhiza         | Bog      | Field | graminoid    | 0.72 | 0.68 | 0.64 | 0.64 | 0.62 |
| Future  | Mycorrhiza         | Fen      | Field | Obligatory   | 0.06 | 0.05 | 0.05 | 0.05 | 0.05 |
| Future  | Mycorrhiza         | Fen      | Field | non-myc.     | 0.19 | 0.19 | 0.17 | 0.18 | 0.17 |
| Future  | Mycorrhiza         | Fen      | Field | Facultative  | 0.75 | 0.77 | 0.78 | 0.78 | 0.79 |
| Future  | Mycorrhiza         | Fen      | Shrub | Obligatory   | 0.59 | 0.65 | 0.67 | 0.69 | 0.69 |
| Future  | Mycorrhiza         | Fen      | Shrub | Facultative  | 0.41 | 0.35 | 0.33 | 0.31 | 0.31 |
| Future  | Mycorrhiza         | Riparian | Field | non-myc.     | 0.20 | 0.19 | 0.17 | 0.18 | 0.17 |
| Future  | Mycorrhiza         | Riparian | Field | Facultative  | 0.80 | 0.81 | 0.83 | 0.82 | 0.83 |
| Future  | Mycorrhiza         | Riparian | Shrub | Obligatory   | 0.80 | 0.85 | 0.88 | 0.89 | 0.89 |
| Future  | Mycorrhiza         | Riparian | Shrub | Facultative  | 0.20 | 0.15 | 0.12 | 0.11 | 0.11 |
